# Supplementary material
Source: publisher figshare collection journal article supplement (https://acs.figshare.com/ndownloader/files/4775128)
Supplement: Supplementary file 1 [file 4775128]

  
data_040804c 
  
_audit_creation_method            SHELXL-97 
_chemical_name_systematic 
; 
 ? 
; 
_chemical_name_common             ? 
_chemical_melting_point           ? 
_chemical_formula_moiety          ? 
_chemical_formula_sum 
 'C7 H4 N O6 Zn' 
_chemical_formula_weight          263.48 
  
loop_ 
 _atom_type_symbol 
 _atom_type_description 
 _atom_type_scat_dispersion_real 
 _atom_type_scat_dispersion_imag 
 _atom_type_scat_source 
 'C'  'C'   0.0033   0.0016 
 'International Tables Vol C Tables 4.2.6.8 and 6.1.1.4' 
 'H'  'H'   0.0000   0.0000 
 'International Tables Vol C Tables 4.2.6.8 and 6.1.1.4' 
 'N'  'N'   0.0061   0.0033 
 'International Tables Vol C Tables 4.2.6.8 and 6.1.1.4' 
 'O'  'O'   0.0106   0.0060 
 'International Tables Vol C Tables 4.2.6.8 and 6.1.1.4' 
 'Zn'  'Zn'   0.2839   1.4301 
 'International Tables Vol C Tables 4.2.6.8 and 6.1.1.4' 
  
_symmetry_cell_setting            Tetragonal 
_symmetry_space_group_name_H-M    P-42(1)c 
  
loop_ 
 _symmetry_equiv_pos_as_xyz 
 'x, y, z' 
 '-x, -y, z' 
 'y, -x, -z' 
 '-y, x, -z' 
 '-x+1/2, y+1/2, -z+1/2' 
 'x+1/2, -y+1/2, -z+1/2' 
 '-y+1/2, -x+1/2, z+1/2' 
 'y+1/2, x+1/2, z+1/2' 
  
_cell_length_a                    10.0228(19) 
_cell_length_b                    10.0228(19) 
_cell_length_c                    16.583(6) 
_cell_angle_alpha                 90.00 
_cell_angle_beta                  90.00 
_cell_angle_gamma                 90.00 
_cell_volume                      1665.8(8) 
_cell_formula_units_Z             8 
_cell_measurement_temperature     293(2) 
_cell_measurement_reflns_used     927 
_cell_measurement_theta_min       3.78 
_cell_measurement_theta_max       26.06 
  
_exptl_crystal_description        ? 
_exptl_crystal_colour             ? 
_exptl_crystal_size_max           0.20 
_exptl_crystal_size_mid           0.20 
_exptl_crystal_size_min           0.10 
_exptl_crystal_density_meas       NONE 
_exptl_crystal_density_diffrn     2.101 
_exptl_crystal_density_method     'not measured' 
_exptl_crystal_F_000              1048 
_exptl_absorpt_coefficient_mu     2.957 
_exptl_absorpt_correction_type    MULTI-SCAN 
_exptl_absorpt_correction_T_min   0.729199 
_exptl_absorpt_correction_T_max   1.000000 
_exptl_absorpt_process_details    SADABS 
  
_exptl_special_details 
; 
 ? 
; 
  
_diffrn_ambient_temperature       293(2) 
_diffrn_radiation_wavelength      0.71073 
_diffrn_radiation_type            MoK\a 
_diffrn_radiation_source          'fine-focus sealed tube' 
_diffrn_radiation_monochromator   graphite 
_diffrn_measurement_device_type   'CCD area detector' 
_diffrn_measurement_method        'phi and omega scans' 
_diffrn_detector_area_resol_mean  ? 
_diffrn_standards_number          ? 
_diffrn_standards_interval_count  ? 
_diffrn_standards_interval_time   ? 
_diffrn_standards_decay_%         ? 
_diffrn_reflns_number             9044 
_diffrn_reflns_av_R_equivalents   0.0508 
_diffrn_reflns_av_sigmaI/netI     0.0358 
_diffrn_reflns_limit_h_min        -11 
_diffrn_reflns_limit_h_max        12 
_diffrn_reflns_limit_k_min        -11 
_diffrn_reflns_limit_k_max        12 
_diffrn_reflns_limit_l_min        -20 
_diffrn_reflns_limit_l_max        10 
_diffrn_reflns_theta_min          2.37 
_diffrn_reflns_theta_max          26.31 
_reflns_number_total              1697 
_reflns_number_gt                 1551 
_reflns_threshold_expression      >2sigma(I) 
  
_computing_data_collection        'Bruker SMART' 
_computing_cell_refinement        'Bruker SMART' 
_computing_data_reduction         'Bruker SAINT' 
_computing_structure_solution     'SHELXS-97 (Sheldrick, 1990)' 
_computing_structure_refinement   'SHELXL-97 (Sheldrick, 1997)' 
_computing_molecular_graphics     'Bruker SHELXTL' 
_computing_publication_material   'Bruker SHELXTL' 
  
_refine_special_details 
; 
 Refinement of F^2^ against ALL reflections.  The weighted R-factor wR and 
 goodness of fit S are based on F^2^, conventional R-factors R are based 
 on F, with F set to zero for negative F^2^. The threshold expression of 
 F^2^ > 2sigma(F^2^) is used only for calculating R-factors(gt) etc. and is 
 not relevant to the choice of reflections for refinement.  R-factors based 
 on F^2^ are statistically about twice as large as those based on F, and R- 
 factors based on ALL data will be even larger. 
; 
  
_refine_ls_structure_factor_coef  Fsqd 
_refine_ls_matrix_type            full 
_refine_ls_weighting_scheme       calc 
_refine_ls_weighting_details 
 'calc w=1/[\s^2^(Fo^2^)+(0.0403P)^2^+4.1255P] where P=(Fo^2^+2Fc^2^)/3' 
_atom_sites_solution_primary      direct 
_atom_sites_solution_secondary    difmap 
_atom_sites_solution_hydrogens    geom 
_refine_ls_hydrogen_treatment     mixed 
_refine_ls_extinction_method      none 
_refine_ls_extinction_coef        ? 
_refine_ls_abs_structure_details 
 'Flack H D (1983), Acta Cryst. A39, 876-881' 
_refine_ls_abs_structure_Flack    0.03(3) 
_refine_ls_number_reflns          1697 
_refine_ls_number_parameters      147 
_refine_ls_number_restraints      4 
_refine_ls_R_factor_all           0.0455 
_refine_ls_R_factor_gt            0.0399 
_refine_ls_wR_factor_ref          0.0963 
_refine_ls_wR_factor_gt           0.0939 
_refine_ls_goodness_of_fit_ref    1.108 
_refine_ls_restrained_S_all       1.106 
_refine_ls_shift/su_max           0.001 
_refine_ls_shift/su_mean          0.000 
  
loop_ 
 _atom_site_label 
 _atom_site_type_symbol 
 _atom_site_fract_x 
 _atom_site_fract_y 
 _atom_site_fract_z 
 _atom_site_U_iso_or_equiv 
 _atom_site_adp_type 
 _atom_site_occupancy 
 _atom_site_symmetry_multiplicity 
 _atom_site_calc_flag 
 _atom_site_refinement_flags 
 _atom_site_disorder_assembly 
 _atom_site_disorder_group 
Zn1 Zn 0.76110(5) 0.72175(5) -0.03071(3) 0.01925(17) Uani 1 1 d . . . 
O1 O 0.7584(5) 0.5154(3) 0.0075(2) 0.0296(10) Uani 1 1 d . . . 
O2 O 0.7022(4) 0.3848(3) 0.1105(2) 0.0256(10) Uani 1 1 d . . . 
O3 O 0.7565(4) 0.9411(3) -0.0033(2) 0.0236(9) Uani 1 1 d . . . 
O4 O 0.7029(4) 1.0797(3) 0.0967(2) 0.0232(9) Uani 1 1 d . . . 
O5 O 0.5516(4) 0.7468(4) 0.3118(2) 0.0338(9) Uani 1 1 d . . . 
N1 N 0.7215(4) 0.7326(4) 0.0884(2) 0.0156(8) Uani 1 1 d . . . 
C1 C 0.7215(6) 0.4967(5) 0.0782(3) 0.0190(12) Uani 1 1 d . . . 
C2 C 0.6942(6) 0.6201(5) 0.1286(4) 0.0206(12) Uani 1 1 d . . . 
C3 C 0.6413(6) 0.6203(5) 0.2040(4) 0.0228(13) Uani 1 1 d . . . 
H3 H 0.6265 0.5408 0.2314 0.027 Uiso 1 1 calc R . . 
C4 C 0.6100(5) 0.7419(6) 0.2392(3) 0.0232(11) Uani 1 1 d . . . 
C5 C 0.6402(6) 0.8586(5) 0.1976(4) 0.0231(12) Uani 1 1 d . . . 
H5 H 0.6234 0.9416 0.2206 0.028 Uiso 1 1 calc R . . 
C6 C 0.6956(5) 0.8492(5) 0.1218(3) 0.0180(12) Uani 1 1 d . . . 
C7 C 0.7194(6) 0.9664(5) 0.0668(3) 0.0182(11) Uani 1 1 d . . . 
O6 O 0.5000 1.0000 0.8738(4) 0.0372(16) Uani 1 2 d SD . . 
H6A H 0.574(5) 0.982(17) 0.8506(16) 0.07(6) Uiso 0.50 1 d PD . . 
H6B H 0.5000 1.0000 0.9250(8) 0.08(5) Uiso 1 2 d SD . . 
O7 O 1.0000 0.0000 0.1207(5) 0.0437(18) Uani 1 2 d SD . . 
H7A H 0.997(9) 0.062(5) 0.086(3) 0.05(3) Uiso 1 1 d D . . 
  
loop_ 
 _atom_site_aniso_label 
 _atom_site_aniso_U_11 
 _atom_site_aniso_U_22 
 _atom_site_aniso_U_33 
 _atom_site_aniso_U_23 
 _atom_site_aniso_U_13 
 _atom_site_aniso_U_12 
Zn1 0.0137(3) 0.0233(3) 0.0207(3) -0.0021(3) 0.0011(3) -0.00015(19) 
O1 0.048(3) 0.0160(16) 0.025(2) -0.0046(14) 0.009(2) 0.0034(18) 
O2 0.036(2) 0.0126(17) 0.028(2) 0.0015(15) 0.0001(19) 0.0022(16) 
O3 0.031(2) 0.0167(16) 0.0234(18) 0.0014(14) 0.0020(19) -0.0011(16) 
O4 0.032(2) 0.0103(17) 0.027(2) -0.0005(15) 0.0049(19) 0.0002(14) 
O5 0.053(2) 0.023(2) 0.026(2) -0.0005(19) 0.0196(18) -0.001(2) 
N1 0.0177(19) 0.0117(17) 0.0175(19) -0.0002(16) 0.0010(16) -0.0008(18) 
C1 0.015(3) 0.019(2) 0.023(3) 0.001(2) -0.001(3) 0.000(2) 
C2 0.025(3) 0.011(2) 0.026(3) 0.000(2) -0.003(2) 0.0041(19) 
C3 0.028(3) 0.013(3) 0.027(3) 0.007(2) 0.002(3) 0.000(2) 
C4 0.026(3) 0.016(3) 0.027(3) 0.000(2) 0.001(2) 0.002(2) 
C5 0.025(3) 0.014(3) 0.030(3) -0.008(2) 0.000(3) -0.0013(19) 
C6 0.016(3) 0.016(2) 0.022(3) 0.000(2) 0.000(2) -0.0032(19) 
C7 0.016(3) 0.015(2) 0.023(3) -0.002(2) -0.003(2) 0.002(2) 
O6 0.042(4) 0.036(4) 0.034(4) 0.000 0.000 0.008(3) 
O7 0.038(4) 0.054(5) 0.039(5) 0.000 0.000 0.014(3) 
  
_geom_special_details 
; 
 All esds (except the esd in the dihedral angle between two l.s. planes) 
 are estimated using the full covariance matrix.  The cell esds are taken 
 into account individually in the estimation of esds in distances, angles 
 and torsion angles; correlations between esds in cell parameters are only 
 used when they are defined by crystal symmetry.  An approximate (isotropic) 
 treatment of cell esds is used for estimating esds involving l.s. planes. 
; 
  
loop_ 
 _geom_bond_atom_site_label_1 
 _geom_bond_atom_site_label_2 
 _geom_bond_distance 
 _geom_bond_site_symmetry_2 
 _geom_bond_publ_flag 
Zn1 O4 1.944(4) 4_755 ? 
Zn1 O2 1.982(4) 4_655 ? 
Zn1 N1 2.017(4) . ? 
Zn1 O1 2.163(4) . ? 
Zn1 O3 2.246(3) . ? 
O1 C1 1.243(6) . ? 
O2 C1 1.259(6) . ? 
O2 Zn1 1.982(4) 3_565 ? 
O3 C7 1.246(6) . ? 
O4 C7 1.250(6) . ? 
O4 Zn1 1.944(4) 3_575 ? 
O5 C4 1.339(6) . ? 
N1 C6 1.319(6) . ? 
N1 C2 1.338(6) . ? 
C1 C2 1.518(7) . ? 
C2 C3 1.358(8) . ? 
C3 C4 1.387(8) . ? 
C3 H3 0.9300 . ? 
C4 C5 1.392(8) . ? 
C5 C6 1.377(8) . ? 
C5 H5 0.9300 . ? 
C6 C7 1.507(7) . ? 
O6 H6A 0.851(10) . ? 
O6 H6B 0.850(10) . ? 
O7 H7A 0.848(10) . ? 
  
loop_ 
 _geom_angle_atom_site_label_1 
 _geom_angle_atom_site_label_2 
 _geom_angle_atom_site_label_3 
 _geom_angle 
 _geom_angle_site_symmetry_1 
 _geom_angle_site_symmetry_3 
 _geom_angle_publ_flag 
O4 Zn1 O2 102.71(15) 4_755 4_655 ? 
O4 Zn1 N1 135.86(16) 4_755 . ? 
O2 Zn1 N1 120.94(15) 4_655 . ? 
O4 Zn1 O1 94.73(17) 4_755 . ? 
O2 Zn1 O1 95.26(17) 4_655 . ? 
N1 Zn1 O1 76.25(14) . . ? 
O4 Zn1 O3 103.05(16) 4_755 . ? 
O2 Zn1 O3 102.53(16) 4_655 . ? 
N1 Zn1 O3 75.23(14) . . ? 
O1 Zn1 O3 151.23(13) . . ? 
C1 O1 Zn1 115.1(3) . . ? 
C1 O2 Zn1 111.0(3) . 3_565 ? 
C7 O3 Zn1 113.2(3) . . ? 
C7 O4 Zn1 120.6(4) . 3_575 ? 
C6 N1 C2 119.8(4) . . ? 
C6 N1 Zn1 119.8(3) . . ? 
C2 N1 Zn1 118.9(3) . . ? 
O1 C1 O2 125.6(5) . . ? 
O1 C1 C2 116.8(4) . . ? 
O2 C1 C2 117.6(5) . . ? 
N1 C2 C3 122.5(5) . . ? 
N1 C2 C1 112.0(5) . . ? 
C3 C2 C1 125.4(5) . . ? 
C2 C3 C4 118.5(5) . . ? 
C2 C3 H3 120.7 . . ? 
C4 C3 H3 120.7 . . ? 
O5 C4 C3 120.6(5) . . ? 
O5 C4 C5 120.7(5) . . ? 
C3 C4 C5 118.7(5) . . ? 
C6 C5 C4 118.9(5) . . ? 
C6 C5 H5 120.6 . . ? 
C4 C5 H5 120.6 . . ? 
N1 C6 C5 121.6(5) . . ? 
N1 C6 C7 113.9(4) . . ? 
C5 C6 C7 124.2(5) . . ? 
O3 C7 O4 126.5(5) . . ? 
O3 C7 C6 116.9(4) . . ? 
O4 C7 C6 116.6(5) . . ? 
H6A O6 H6B 117(2) . . ? 
  
loop_ 
 _geom_torsion_atom_site_label_1 
 _geom_torsion_atom_site_label_2 
 _geom_torsion_atom_site_label_3 
 _geom_torsion_atom_site_label_4 
 _geom_torsion 
 _geom_torsion_site_symmetry_1 
 _geom_torsion_site_symmetry_2 
 _geom_torsion_site_symmetry_3 
 _geom_torsion_site_symmetry_4 
 _geom_torsion_publ_flag 
O4 Zn1 O1 C1 143.5(5) 4_755 . . . ? 
O2 Zn1 O1 C1 -113.3(5) 4_655 . . . ? 
N1 Zn1 O1 C1 7.3(4) . . . . ? 
O3 Zn1 O1 C1 15.1(6) . . . . ? 
O4 Zn1 O3 C7 -141.5(4) 4_755 . . . ? 
O2 Zn1 O3 C7 112.1(4) 4_655 . . . ? 
N1 Zn1 O3 C7 -7.0(4) . . . . ? 
O1 Zn1 O3 C7 -14.8(6) . . . . ? 
O4 Zn1 N1 C6 102.1(4) 4_755 . . . ? 
O2 Zn1 N1 C6 -87.5(4) 4_655 . . . ? 
O1 Zn1 N1 C6 -175.3(4) . . . . ? 
O3 Zn1 N1 C6 8.5(4) . . . . ? 
O4 Zn1 N1 C2 -91.9(4) 4_755 . . . ? 
O2 Zn1 N1 C2 78.5(4) 4_655 . . . ? 
O1 Zn1 N1 C2 -9.4(4) . . . . ? 
O3 Zn1 N1 C2 174.4(4) . . . . ? 
Zn1 O1 C1 O2 173.9(5) . . . . ? 
Zn1 O1 C1 C2 -4.4(7) . . . . ? 
Zn1 O2 C1 O1 -5.4(8) 3_565 . . . ? 
Zn1 O2 C1 C2 172.9(4) 3_565 . . . ? 
C6 N1 C2 C3 -0.7(8) . . . . ? 
Zn1 N1 C2 C3 -166.7(4) . . . . ? 
C6 N1 C2 C1 175.8(5) . . . . ? 
Zn1 N1 C2 C1 9.9(6) . . . . ? 
O1 C1 C2 N1 -3.1(8) . . . . ? 
O2 C1 C2 N1 178.4(5) . . . . ? 
O1 C1 C2 C3 173.4(6) . . . . ? 
O2 C1 C2 C3 -5.1(9) . . . . ? 
N1 C2 C3 C4 2.5(9) . . . . ? 
C1 C2 C3 C4 -173.6(5) . . . . ? 
C2 C3 C4 O5 176.7(5) . . . . ? 
C2 C3 C4 C5 -3.2(8) . . . . ? 
O5 C4 C5 C6 -177.5(5) . . . . ? 
C3 C4 C5 C6 2.4(8) . . . . ? 
C2 N1 C6 C5 -0.2(7) . . . . ? 
Zn1 N1 C6 C5 165.6(4) . . . . ? 
C2 N1 C6 C7 -174.6(5) . . . . ? 
Zn1 N1 C6 C7 -8.8(6) . . . . ? 
C4 C5 C6 N1 -0.7(8) . . . . ? 
C4 C5 C6 C7 173.1(5) . . . . ? 
Zn1 O3 C7 O4 -177.1(5) . . . . ? 
Zn1 O3 C7 C6 4.8(6) . . . . ? 
Zn1 O4 C7 O3 4.9(8) 3_575 . . . ? 
Zn1 O4 C7 C6 -176.9(4) 3_575 . . . ? 
N1 C6 C7 O3 1.9(8) . . . . ? 
C5 C6 C7 O3 -172.3(5) . . . . ? 
N1 C6 C7 O4 -176.4(5) . . . . ? 
C5 C6 C7 O4 9.4(8) . . . . ? 
  
_diffrn_measured_fraction_theta_max    0.998 
_diffrn_reflns_theta_full              26.31 
_diffrn_measured_fraction_theta_full   0.998 
_refine_diff_density_max    0.448 
_refine_diff_density_min   -0.551 
_refine_diff_density_rms    0.089 
